# Supplementary material for: Beneficial effect of Indigo Naturalis on acute lung injury induced by influenza A virus
Source: Research Square preprint supplement (doi:10.21203/rs.3.rs-73166/v3), 2020-12-16
Supplement: Supplementary file 1 [file e94f95fdbf9ea36c854d0622.doc]

| **Supplementary material**  **Figure of Contents** | |
| --- | --- |
|  | |
| Figure S1. Effect of indigo and indirubin on ALI in IAV-infected mice |  |





**Figure S1. Effect of indigo and indirubin on ALI in IAV-infected mice**

Mice were infected with 3 × LD50 of IAV and then administered orally with indigo (6 mg/kg, 30 mg/kg), indirubin (6 mg/kg, 30 mg/kg), ribavirin (100 mg/kg) or 0.5% CMC-Na once daily for 4 days. The mice were sacrificed on day 4 after IAV infection. Mice body weight and lung index were reported and calculated. (A) Lung index = Lung weight / body weight × 100%. (B) Mice body weight growth curve. Data were presented as mean ± S.D. (*n* = 6 ~ 8). * *P* < 0.05, *** *P* < 0.001 compared with model group, tested by ANOVA and Fisher’s PLSD.
